# Supplementary material for: Sex-dependent features of social behavior differ between distinct laboratory mouse strains and their mixed offspring
Source: PubMed Central journal article supplement — iScience. 2022 Jan 5;25(2):103735. doi: 10.1016/j.isci.2022.103735 (PMC8783130; doi:10.1016/j.isci.2022.103735), 2022-01-05
Supplement: mmc1.pdf [file mmc1.pdf]

iScience, Volume 25

## **Supplemental information**

**Sex-dependent features of social behavior  
differ between distinct laboratory  
mouse strains and their mixed offspring**

**Natalia Kopachev, Shai Netser, and Shlomo Wagner**

**A**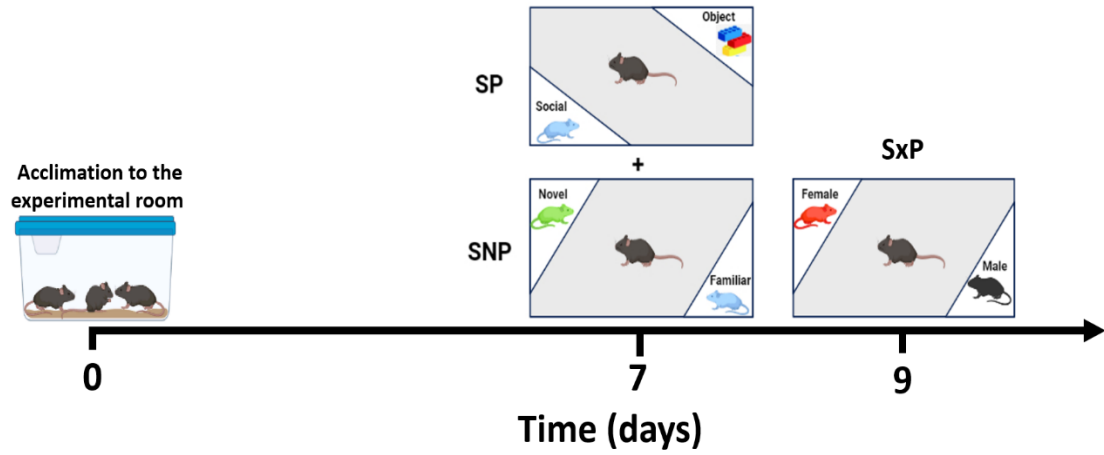**B**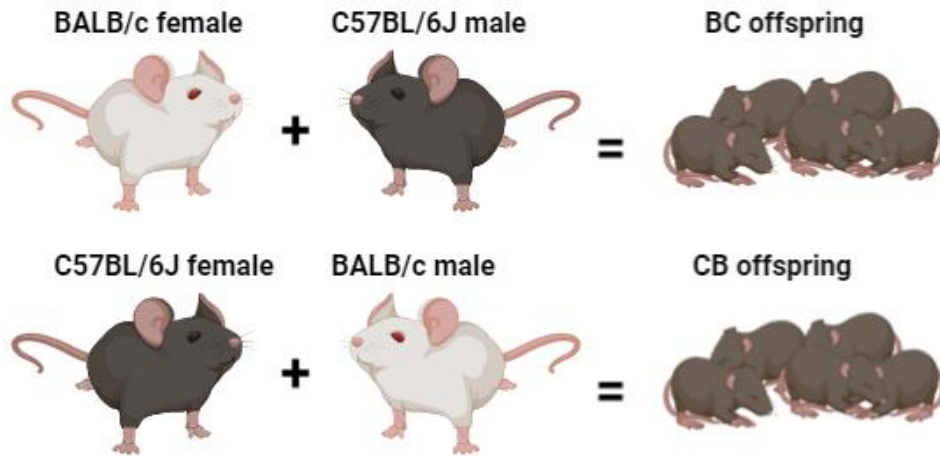

**Figure S1. Schematic depiction of the experimental designs, related to STAR Methods**

(A) Timeline of the experiments.

(B) Cross-breeding scheme.

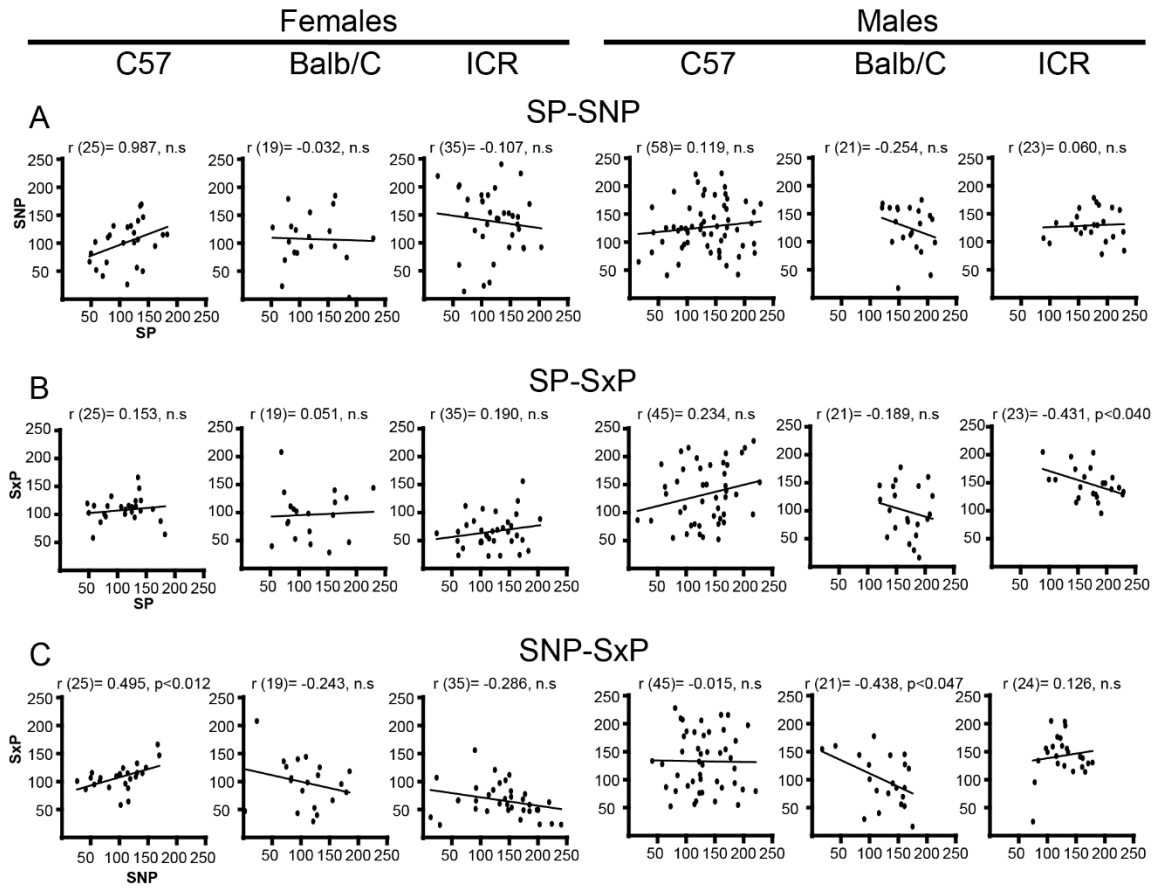

**Figure S2. Correlations of  $\Delta IT$  between the various experiments, related to Figure 2**

Pearson's correlations of  $\Delta IT$  for each mouse of the various groups, between SP and SNP tests (A), SP and SxP tests (B) and SNP and SxP tests (C). regression (r) and significance (p) values are depicted above each plot.

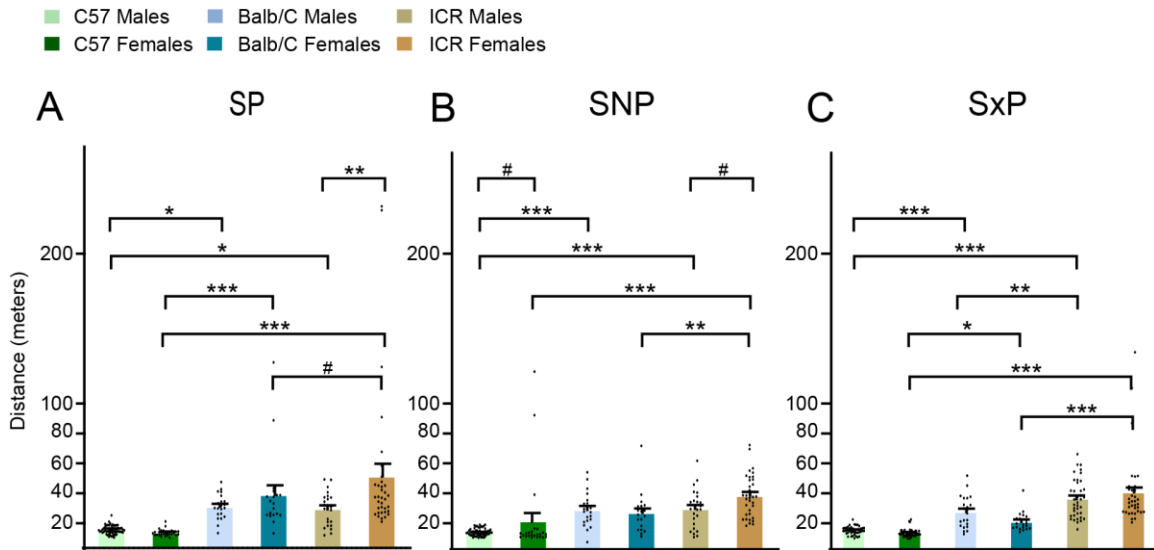

**Figure S3. Strain-, but not sex-dependent difference in the distance traveled during the various experiments, related to Figure 1**

Analysis of the mean distance ( $\pm$ SEM), traveled by the various experimental groups during the SP (A), SNP (B) and SxP (C) tests. # $p < 0.1$ , \* $p < 0.05$ , \*\* $p < 0.01$ , \*\*\* $p < 0.001$ , *post hoc* Holm-Sidak test, following main effect in two-way ANOVA test.

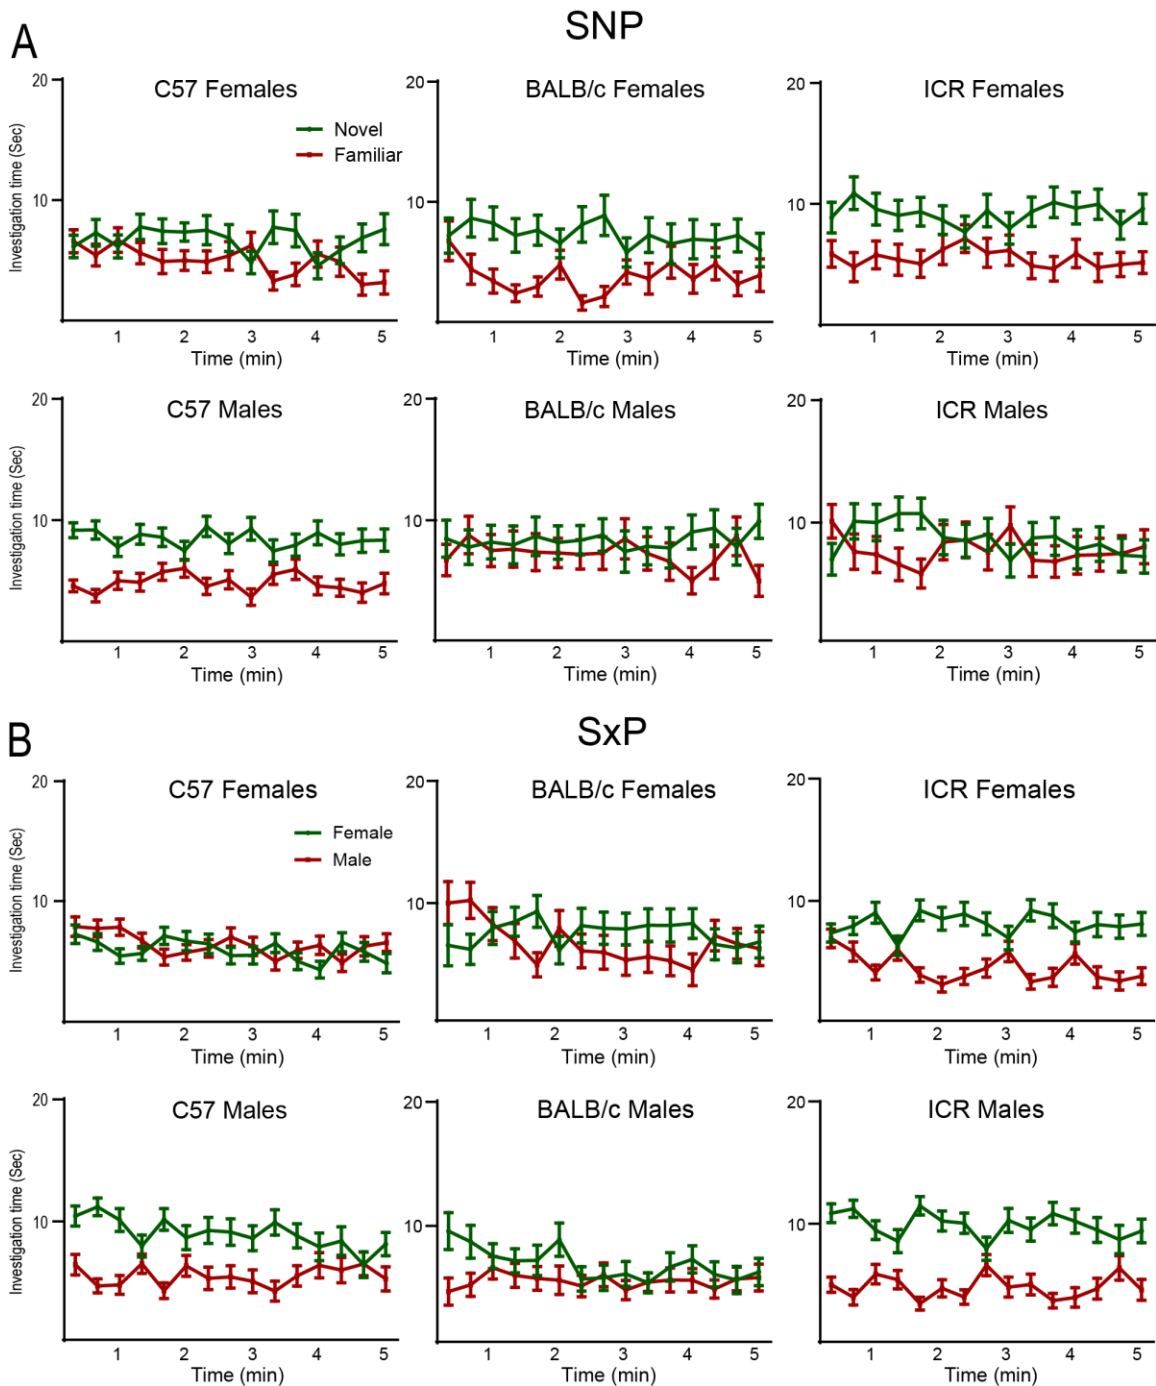

**Figure S4. The behavioral dynamics of investigation behavior during the SNP and**

**SxP tests, related to Figure 5**

Mean investigation time ( $\pm$ SEM), measured separately for each stimulus along the time course of the SNP (A) and SxP (B) session (20-s bins) for females (upper panels) and males (lower panels) of the three strains.

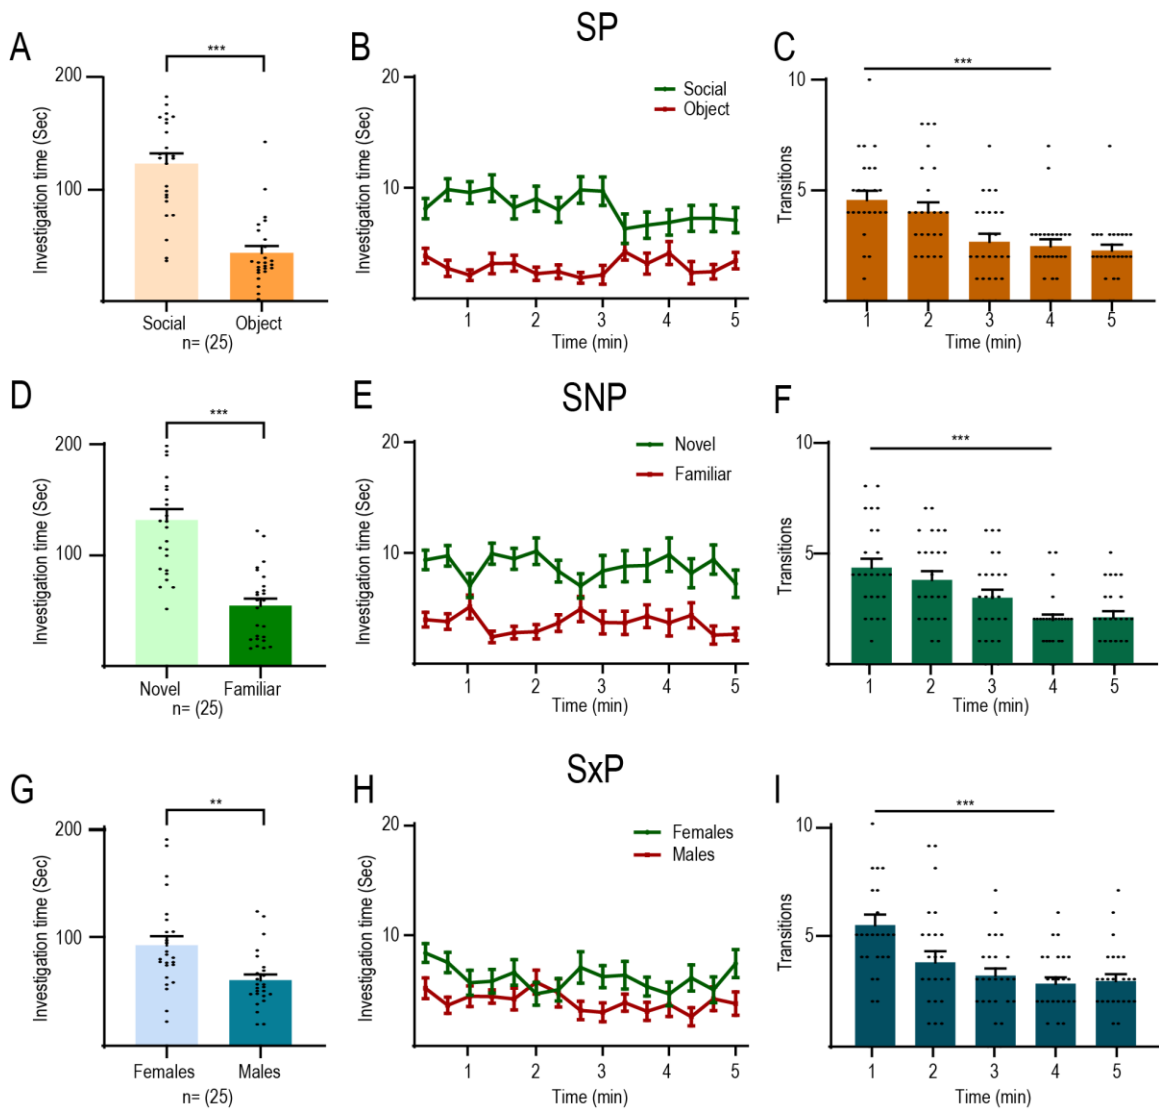

**Figure S5. Behavioral analysis of C57BL/6J male mice raised in our colony, related to Figure 7**

(A) Mean investigation time ( $\pm$ SEM), for each stimulus during the SP test performed by C57BL/6J mice raised in our colony ( $n=25$ ). \*\*\* $p<0.001$ , paired t-test.

(B) Mean investigation time ( $\pm$ SEM), measured separately for each stimulus along the time course of the SP test session (20-s bins).

(C) Mean ( $\pm$ SEM), number of transitions between the two stimuli made during the SP test. \*\*\* $p<0.001$ , one-way repeated ANOVA.

(D-F) As in A-C, for the SNP test.

(G) As in A, for the SxP test. \*\* $p<0.01$ , paired t-test.

(H) As in B, for the SxP test.

(I) As in C, for the SxP test. \*\*\* $p<0.001$ , one-way repeated ANOVA

| Beha' test             | Groups         | Repetitions    | p value (t-test) |
|------------------------|----------------|----------------|------------------|
| SP (Related to Fig.1)  | C57 males      | Group 1 (n=19) | p=0.001          |
|                        |                | Group 2 (n=15) | p=0.001          |
|                        |                | Group 3 (n=24) | p<0.0001         |
|                        | BALB/c males   | Group 1 (n=13) | p<0.0001         |
|                        |                | Group 2 (n=8)  | p=0.001          |
|                        | ICR males      | Group 1 (n=14) | p<0.0001         |
|                        |                | Group 2 (n=9)  | p=0.001          |
|                        | C57 females    | Group 1 (n=11) | p=0.022          |
|                        |                | Group 2 (n=16) | p=0.010          |
|                        | BALB/c females | Group 1 (n=19) | p=0.006          |
|                        | ICR females    | Group 1 (n=20) | p<0.0001         |
|                        |                | Group 2 (n=15) | p=0.006          |
| SNP (Related to Fig.1) | C57 males      | Group 1 (n=19) | p=0.122          |
|                        |                | Group 2 (n=15) | p<0.0001         |
|                        |                | Group 3 (n=24) | p<0.0001         |
|                        | BALB/c males   | Group 1 (n=13) | p=0.077          |
|                        |                | Group 2 (n=8)  | p=0.945          |
|                        | ICR males      | Group 1 (n=15) | p=0.640          |
|                        |                | Group 2 (n=9)  | p=0.115          |
|                        | C57 females    | Group 1 (n=10) | p=0.001          |
|                        |                | Group 2 (n=15) | p=0.348          |
|                        | BALB/c females | Group 1 (n=20) | p<0.0001         |
|                        | ICR females    | Group 1 (n=20) | p=0.006          |
|                        |                | Group 2 (n=15) | p=0.054          |
| SxP (Related to Fig.1) | C57 males      | Group 1 (n=20) | p<0.0001         |
|                        |                | Group 2 (n=25) | p=0.159          |
|                        | BALB/c males   | Group 1 (n=13) | p=0.556          |
|                        |                | Group 2 (n=9)  | p=0.081          |
|                        | ICR males      | Group 1 (n=23) | p<0.0001         |
|                        |                | Group 2 (n=15) | p<0.0001         |
|                        | C57 females    | Group 1 (n=15) | p=0.011          |
|                        |                | Group 2 (n=15) | p=0.540          |
|                        |                | Group 3 (n=20) | p=0.517          |
|                        | BALB/c females | Group 1 (n=20) | p=0.469          |
|                        | ICR females    | Group 1 (n=20) | p=0.001          |
|                        |                | Group 2 (n=15) | p=0.001          |
| SP (Related to Fig.7)  | BC             | Group 1 (n=19) | p=0.094          |
|                        |                | Group 2 (n=17) | p=0.157          |
|                        | CB             | Group 1 (n=24) | p=0.153          |
|                        |                | Group 2 (n=23) | p=0.018          |
| SNP (Related to Fig.7) | BC             | Group 1 (n=12) | p=0.680          |
|                        |                | Group 2 (n=7)  | p=0.735          |
|                        | CB             | Group 1 (n=13) | p=0.175          |
|                        |                | Group 2 (n=11) | p=0.760          |
| SxP (Related to Fig.7) | BC             | Group 1 (n=16) | p<0.0001         |
|                        |                | Group 2 (n=17) | p=0.184          |
|                        | CB             | Group 1 (n=22) | p<0.0001         |
|                        |                | Group 2 (n=23) | p<0.0001         |

**Table S1. Repetitions on the various experiments , related to Figure 1 and Figure 7**  
Statistical tests conducted separately for each cohort of animals, as related to figures 1 and 7.
